# Supplementary material
Source: publisher site journal article supplement (https://www.dovepress.com/article/254485)
Supplement: Supplementary file 1 [file get_supplementary_file.php]

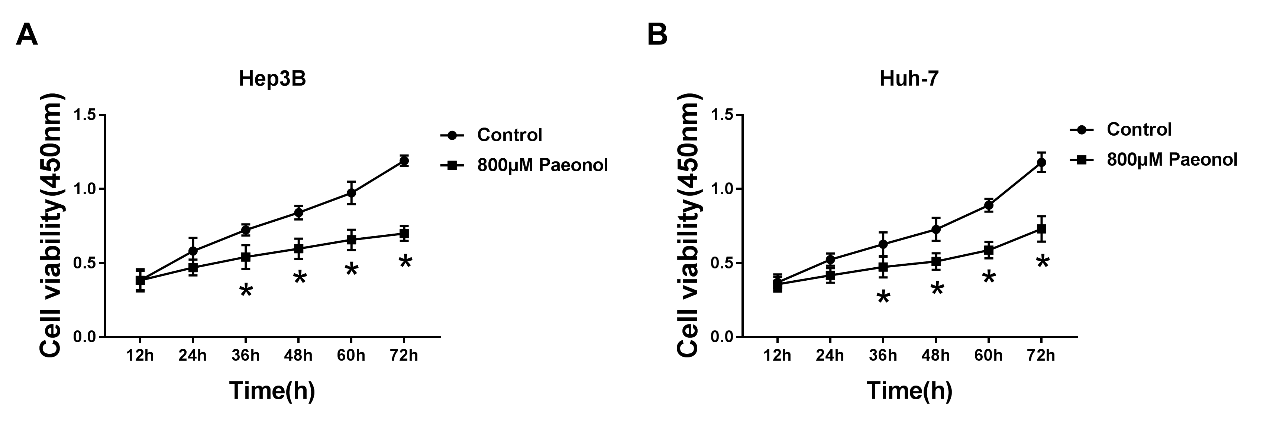


**Supplement Figure 1. Paeonol inhibited cell proliferation in HCC cells.** (A-B) Cell viability was detected by CCK-8 assay after treated with different time. **P* < 0.05.
